# Supplementary material for: Assisted delivery of anti-tumour platinum drugs using DNA-coiling gold nanoparticles bearing lumophores and intercalators: towards a new generation of multimodal nanocarriers with enhanced action
Source: PubMed Central journal article supplement (PMC7003971; doi:10.1039/c9sc02640a), 2019-08-13
Supplement: SC-010-C9SC02640A-s001.pdf [file SC-010-C9SC02640A-s001.pdf]

## SUPPLEMENTARY INFORMATION

### Assisted delivery of anti-tumour platinum drugs using DNA-coiling gold nanoparticles bearing lumophores and intercalators: Towards a new generation of multimodal nanocarriers with enhanced action.

Ana B. Caballero,<sup>a</sup> Lucia Cardo,<sup>a</sup> Sunil Claire,<sup>a</sup> James S. Craig,<sup>b</sup> Anton Vladyka,<sup>a</sup> Tim Albrecht,<sup>a</sup> Luke A. Rochford,<sup>a</sup> Nikolas J. Hodges,<sup>c</sup> Zoe Pikramenou<sup>\*a</sup> and Michael J. Hannon<sup>\*a</sup>

(a) School of Chemistry; (b) Physical Sciences for Health Centre (c) School of Biosciences, University of Birmingham, Edgbaston, Birmingham B15 2TT, United Kingdom.

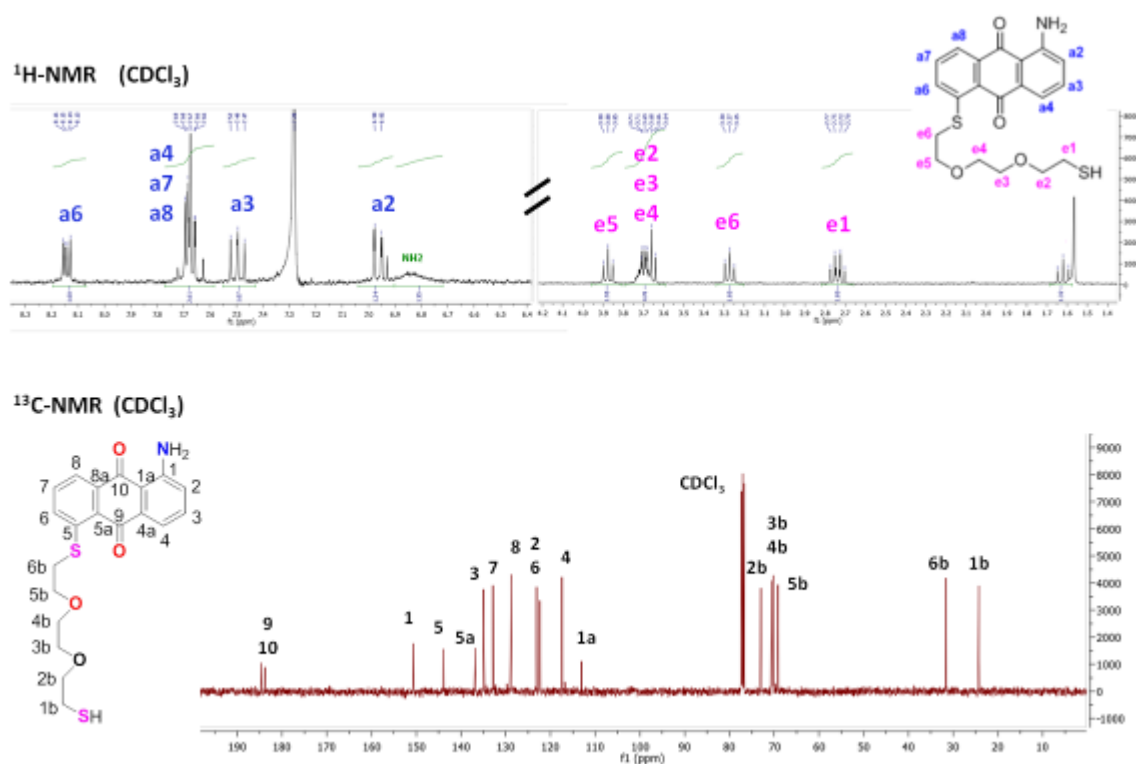

**Figure S1.** <sup>1</sup>H-NMR and <sup>13</sup>C-NMR spectra of AA compound.

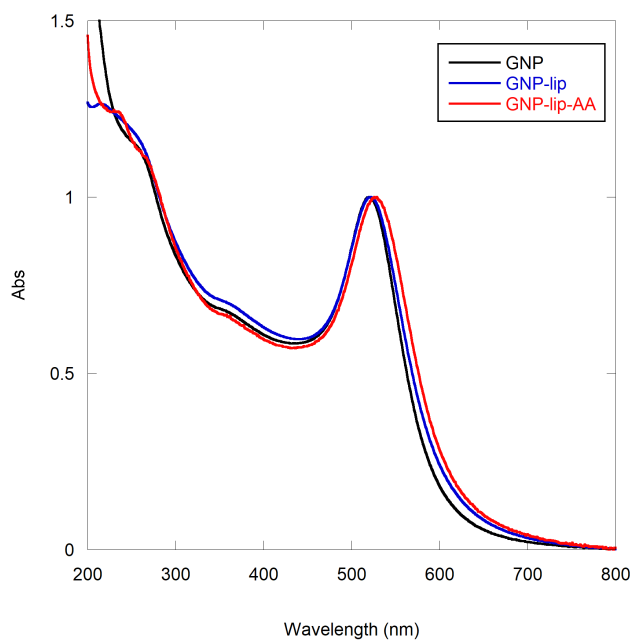

**Figure S2.** Normalized UV-Vis spectra of *GNP*, *GNP-lip* and *GNP-lip-AA* in water. The magnitude of the red shift is greater than instrumental error

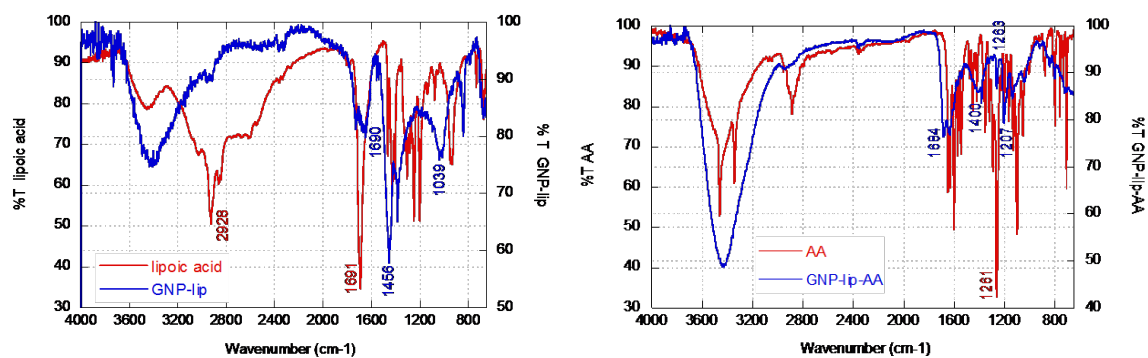

**Figure S3.** FT-IR spectra of (a) *GNP-lip* and (b) *GNP-lip-AA*. The disappearance of the S-H band in the nanoparticles confirms the binding to the gold surface via this group.

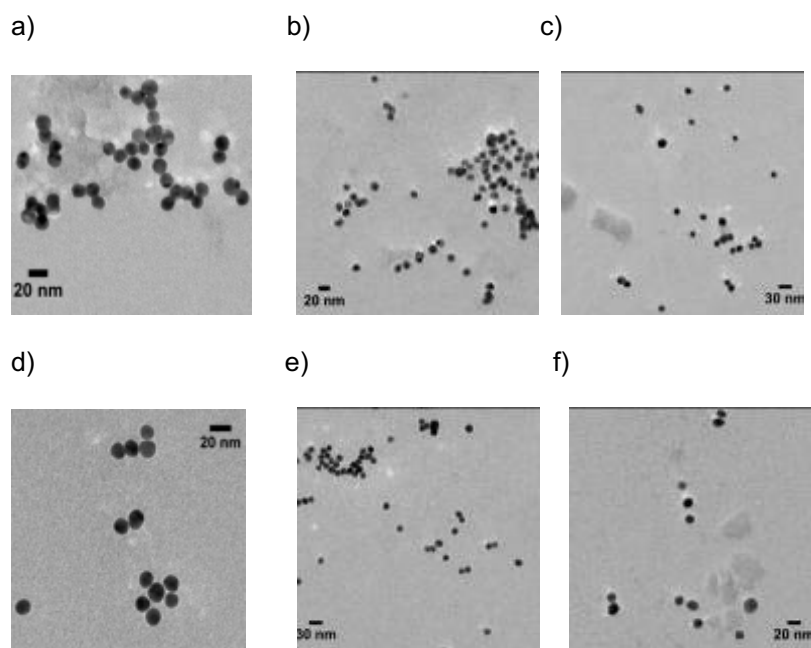

**Figure S4.** TEM images of (a) *GNP-lip*, (b) *GNP-lip-PtII*, (c) *GNP-lip-PtIVsuc*, (d) *GNP-lip-AA*, (e) *GNP-lip-AA-PtII*, (f) *GNP-lip-AA-PtIVsuc*.

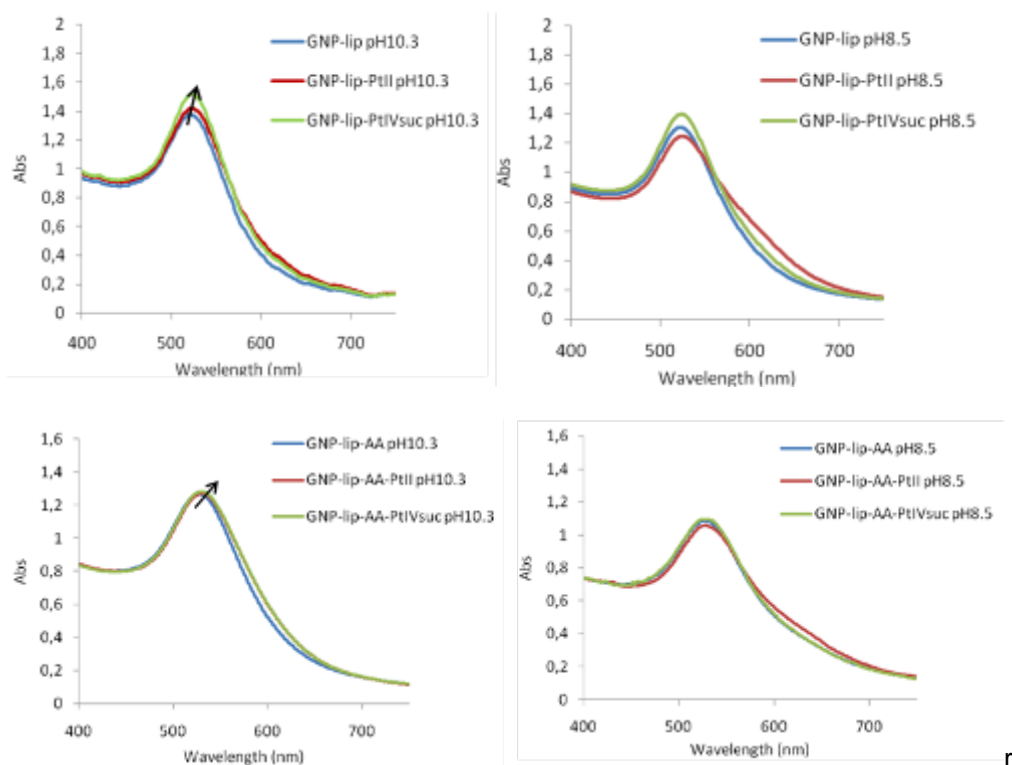

**Figure S5.** UV-Vis spectra of the nanocarriers *GNP-Lip* (top) and *GNP-Lip-AA* (bottom) before and after functionalization with platinum drugs and before and after purification (on the left and on the right, respectively).

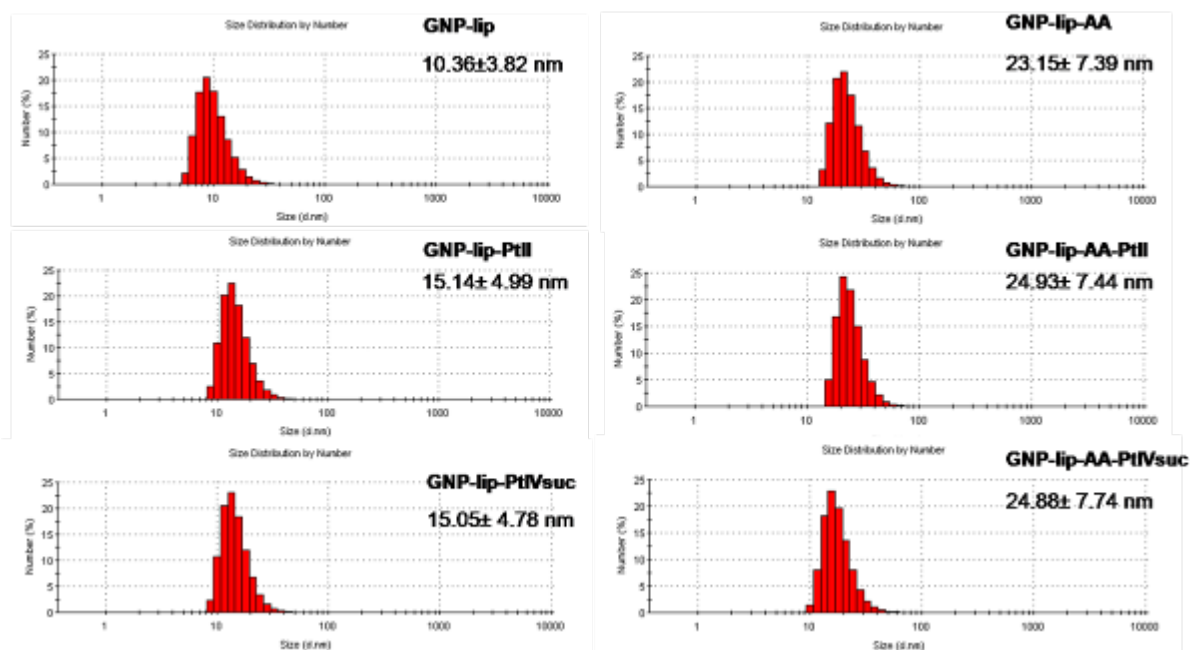

**Figure S6.** Dynamic light scattering (DLS) particle size distribution graphs of the conjugates. Addition of platinum does not affect dispersity.

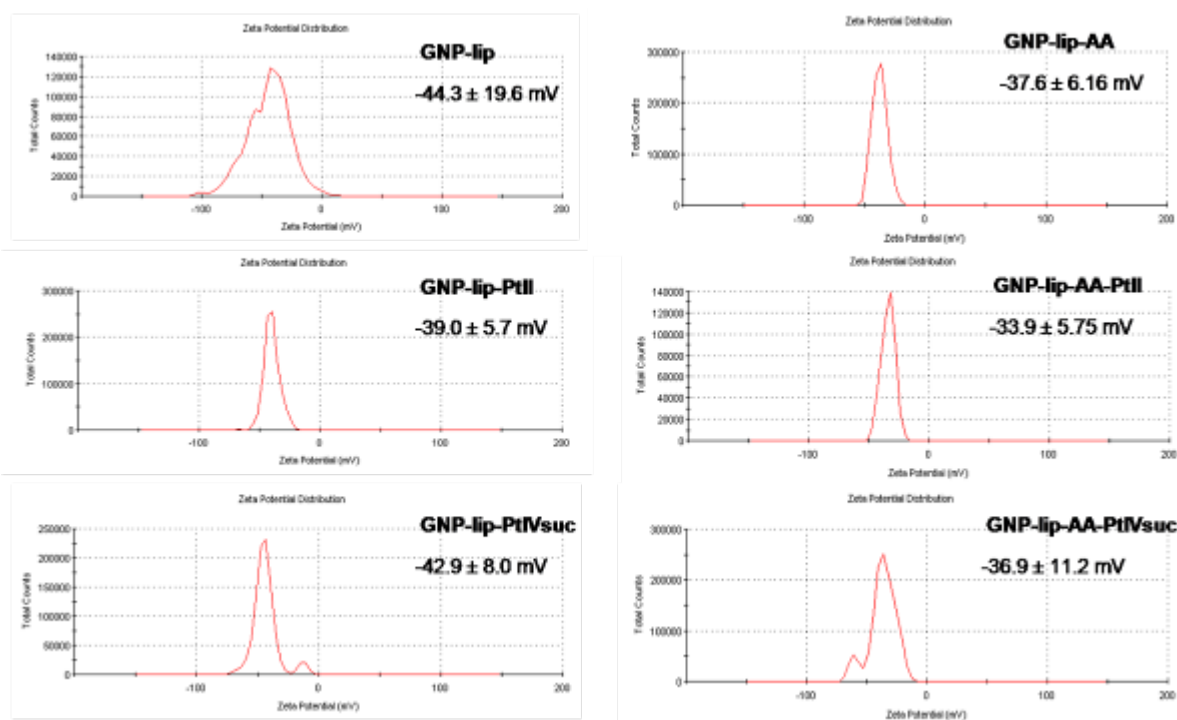

**Figure S7.**  $\xi$ - potential distribution graphs of the conjugates.

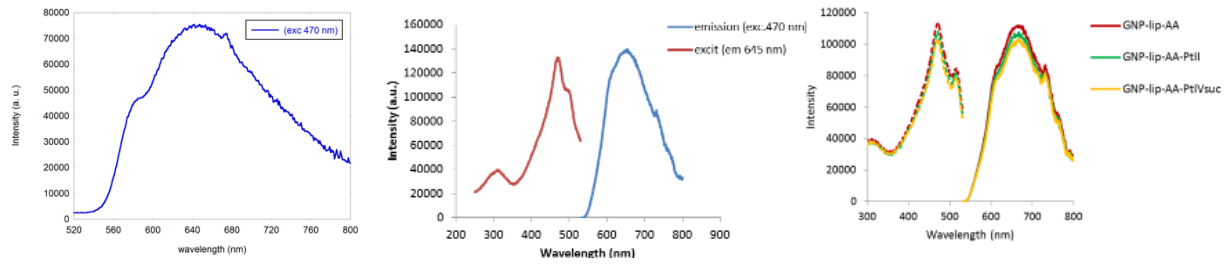

**Figure S8.** On the left, emission of AA upon excitation at 470 nm. AA is poorly soluble in water, therefore it was pre-dissolved in ethanol and added to water to get a final concentration of 2  $\mu\text{M}$ . In the middle, excitation (red line) and emission spectra (blue line) of *GNP-lip-AA* in water. On the right, excitation (dashed lines) and emission spectra (solid lines) of *GNP-lip-AA* before and after binding of *PtlI* and *PtlVsuc* in water. All measurements were carried in a Edinburgh Instruments FLSP920 fluorescence spectrometer using a 1 mL quartz cuvette.

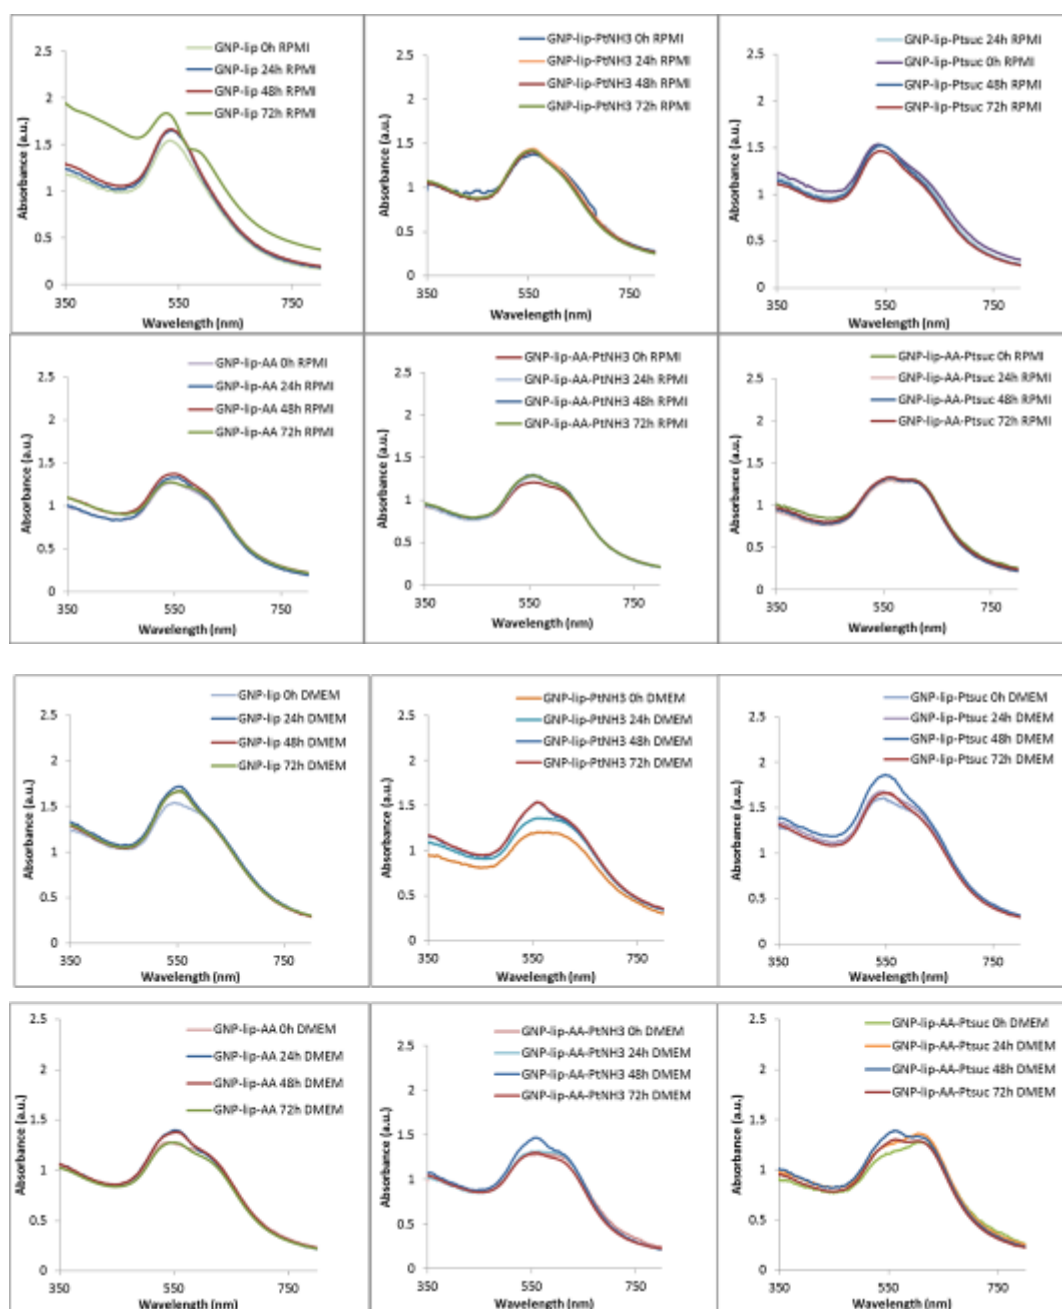

**Figure S9.** UV-Vis spectra of Pt drug-nanocarriers in supplemented cell media RPMI 1640 (top) and DMEM (bottom) at different times.

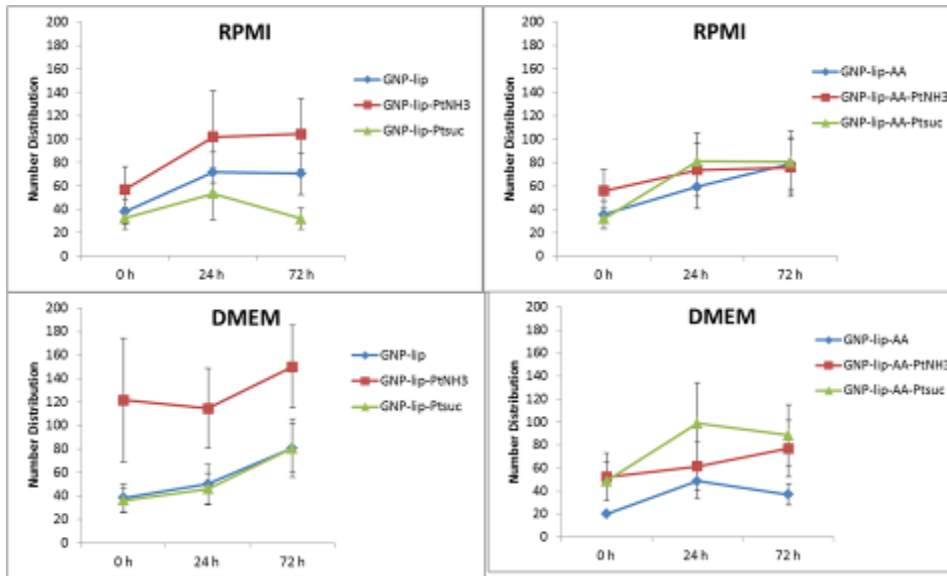

**Figure S10.** DLS particle size measurements in cell media at different times.

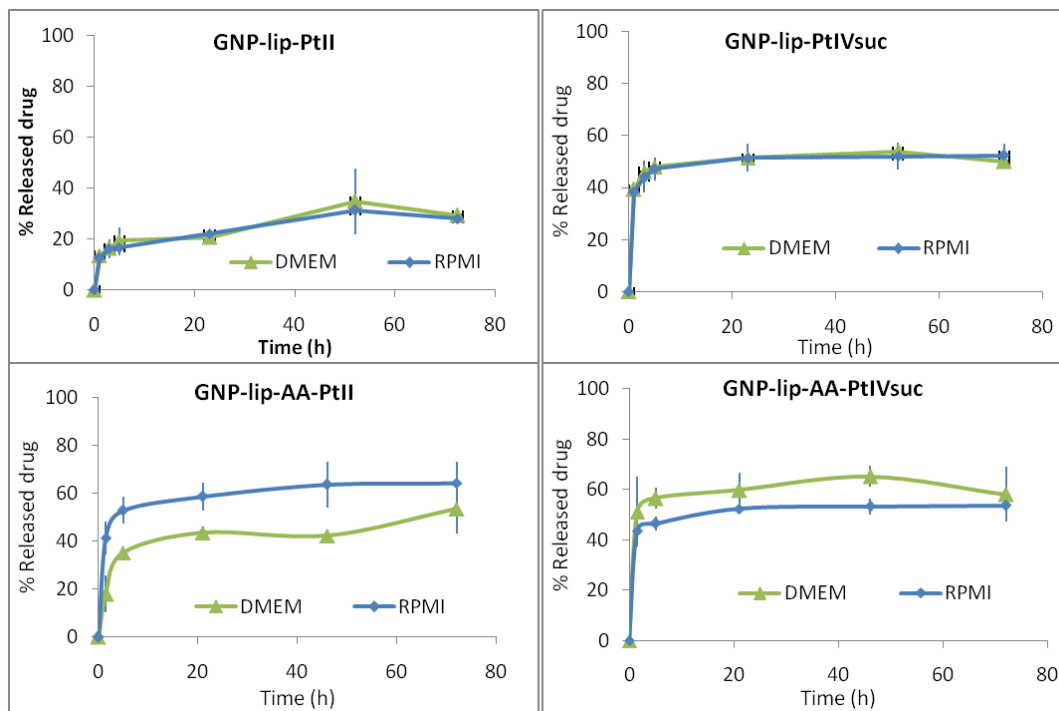

**Figure S11.** *In vitro* cumulative release of Pt drug from their respective conjugates in RPMI 1640 and DMEM cell media (37 °C, 5% CO<sub>2</sub>, pH 7.4).

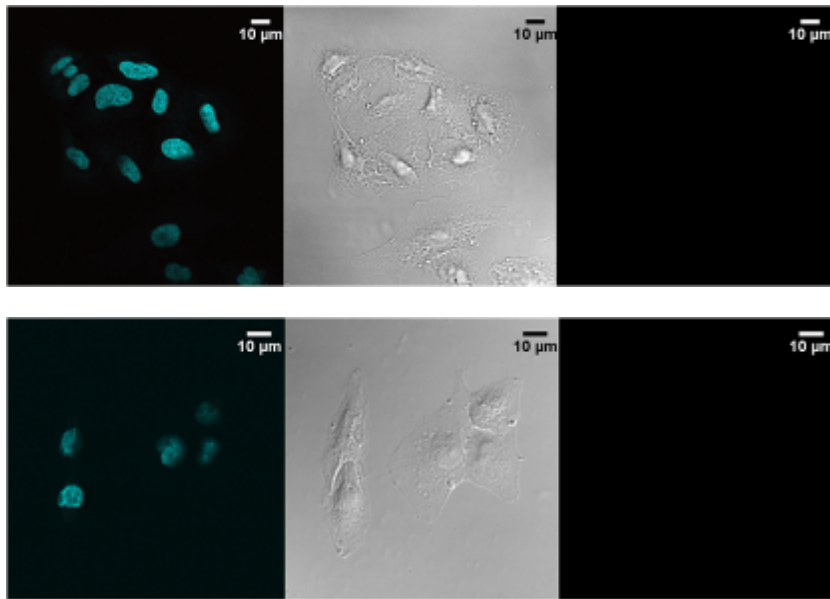

**Figure S12.** CLSM images of non-treated A549 cells after 3 h (top) and 24 h (bottom). From left to right, fluorescence overlay image of AuNP fluorescence (red) and Hoechst nuclear stain (cyan), bright field mode, and reflection mode.

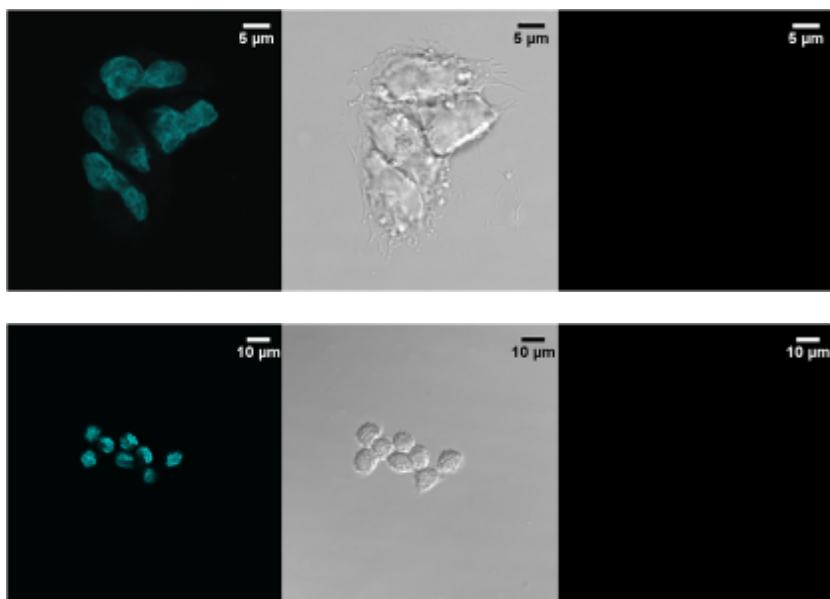

**Figure S13.** CLSM images of non-treated A2780 cells after 3 h (top) and 24 h (bottom). From left to right, fluorescence overlay image of AuNP fluorescence (red) and Hoechst nuclear stain (cyan), bright field mode, and reflection mode.



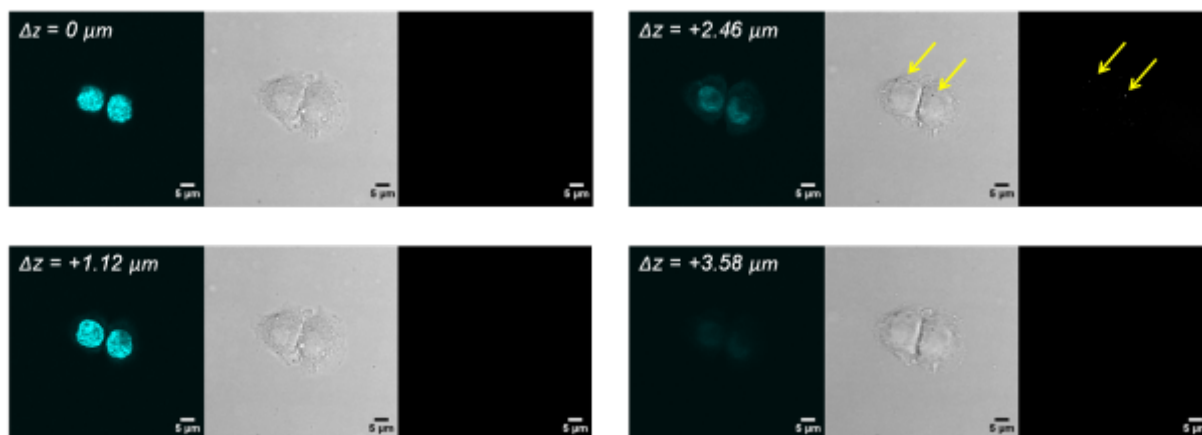

**Figure S14.** CLSM z-stack images of A549 cells treated with **GNP-lip** for 3 h. From left to right, fluorescence overlay image of AuNP fluorescence (red) and Hoechst nuclear stain (cyan), bright field mode, and reflection mode..

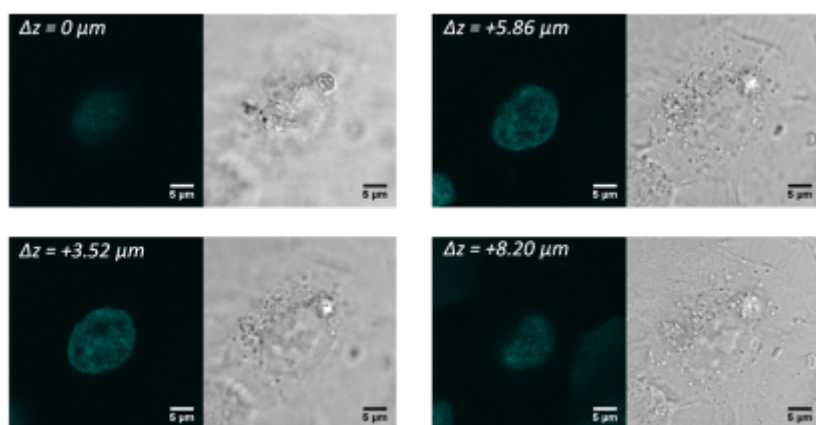

**Figure S15.** CLSM z-stack images of A549 cells treated with **GNP-lip** for 24 h. From left to right, fluorescence overlay image of AuNP fluorescence (red) and Hoechst nuclear stain (cyan), and bright field mode.

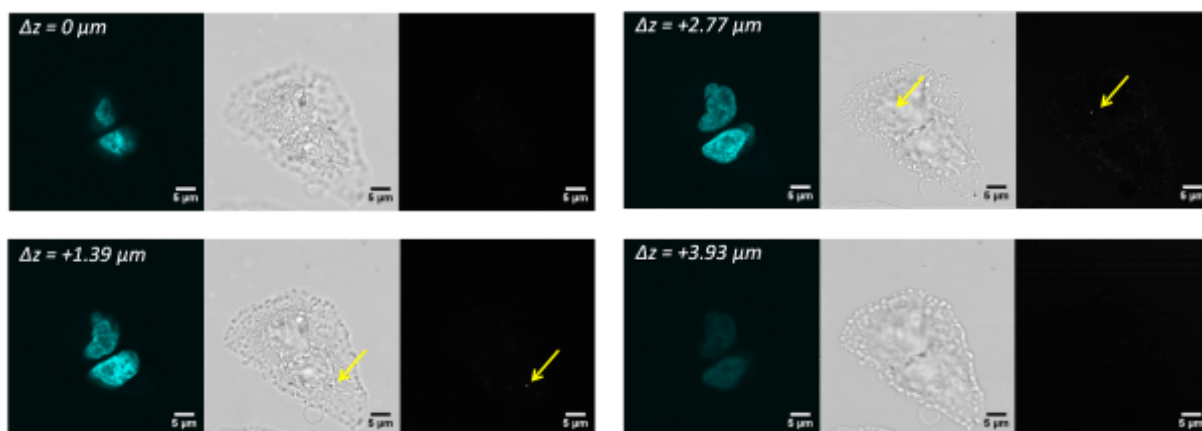

**Figure S16.** CLSM z-stack images of A549 cells treated with **GNP-lip-PtII** for 3 h. From left to right, fluorescence overlay image of AuNP fluorescence (red) and Hoechst nuclear stain (cyan), and bright field mode.

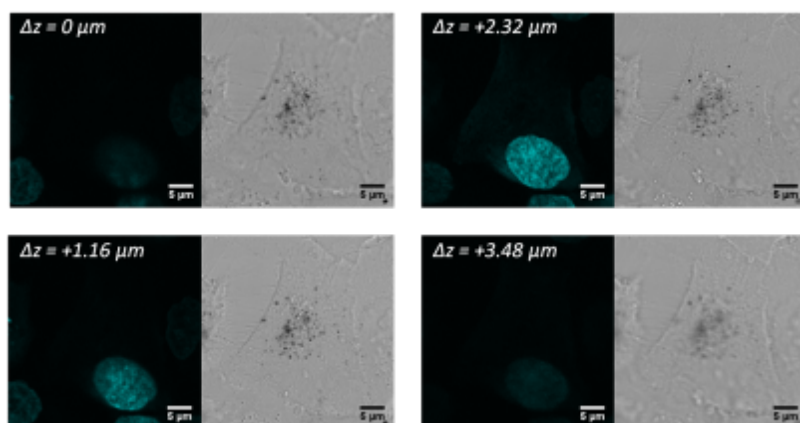

**Figure S17.** CLSM z-stack images of A549 cells treated with **GNP-lip-PtII** for 24 h. From left to right, fluorescence overlay image of AuNP fluorescence (red) and Hoechst nuclear stain (cyan), and bright field mode.

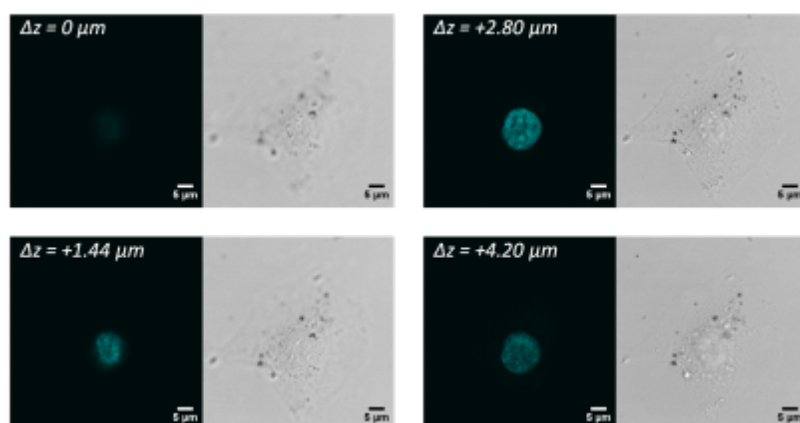

**Figure S18.** CLSM z-stack images of A549 cells treated with **GNP-lip-PtIVsuc** for 3 h. From left to right, fluorescence overlay image of AuNP fluorescence (red) and Hoechst nuclear stain (cyan), and bright field mode.

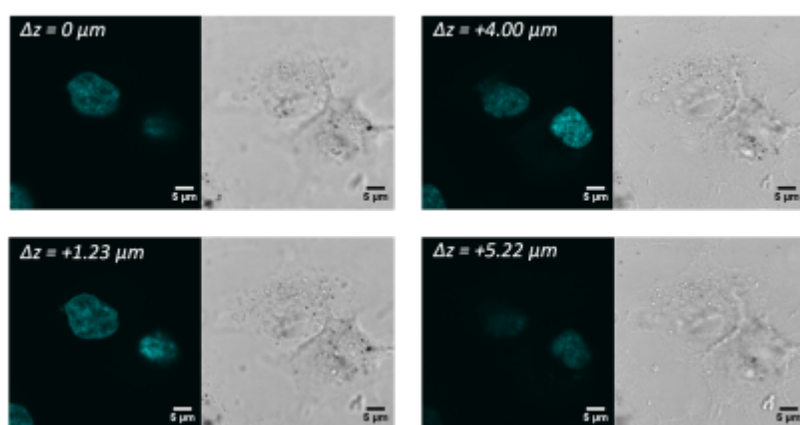

**Figure S19.** CLSM z-stack images of A549 cells treated with **GNP-lip-PtIVsuc** for 24 h. From left to right, fluorescence overlay image of AuNP fluorescence (red) and Hoechst nuclear stain (cyan), and bright field mode.

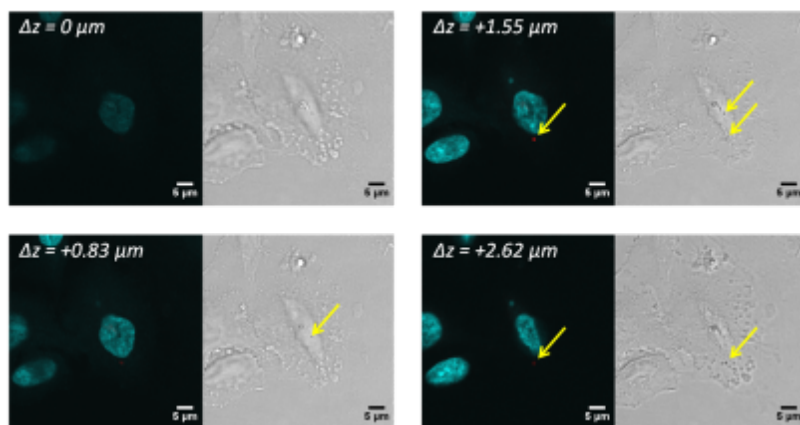

**Figure S20.** CLSM z-stack images of A549 cells treated with **GNP-lip-AA** for 3 h. From left to right, fluorescence overlay image of AuNP fluorescence (red) and Hoechst nuclear stain (cyan), and bright field mode.

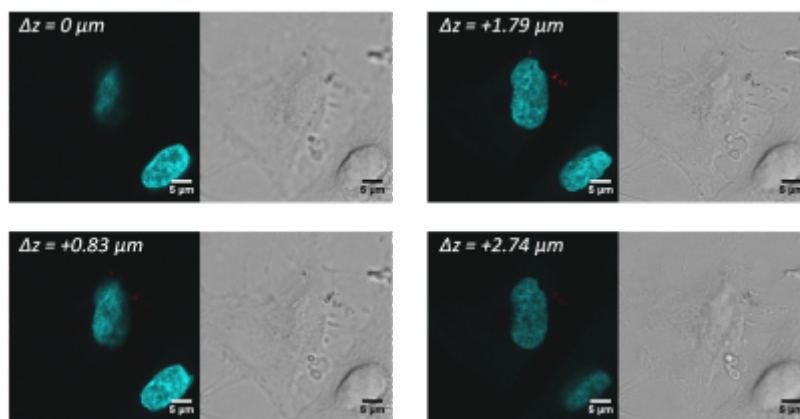

**Figure S21.** CLSM z-stack images of A549 cells treated with **GNP-lip-AA** for 24 h. From left to right, fluorescence overlay image of AuNP fluorescence (red) and Hoechst nuclear stain (cyan), and bright field mode.

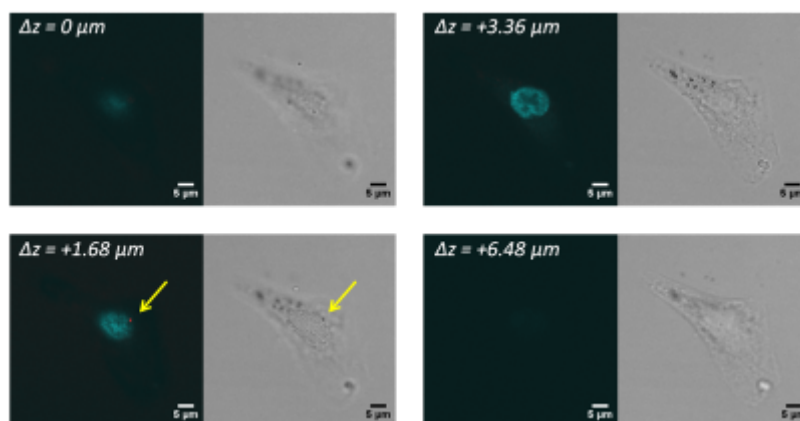

**Figure S22.** CLSM z-stack images of A549 cells treated with **GNP-lip-AA-PtII** for 3 h. From left to right, fluorescence overlay image of AuNP fluorescence (red) and Hoechst nuclear stain (cyan), and bright field mode.

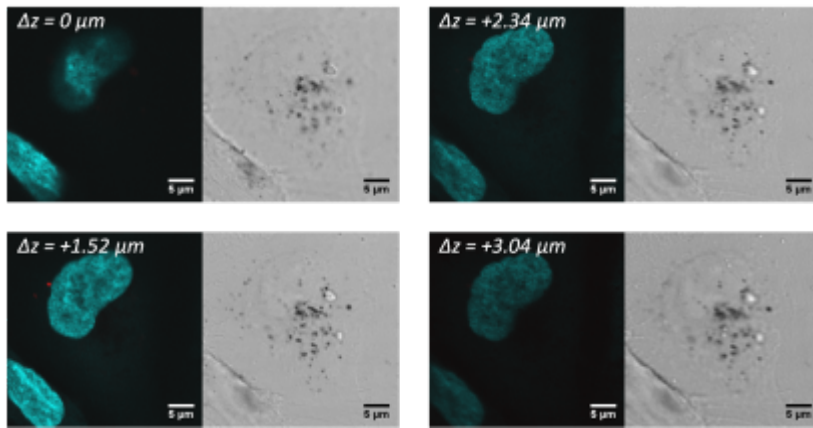

**Figure S23.** CLSM z-stack images of A549 cells treated with **GNP-lip-AA-PtII** for 24 h. From left to right, fluorescence overlay image of AuNP fluorescence (red) and Hoechst nuclear stain (cyan), and bright field mode.

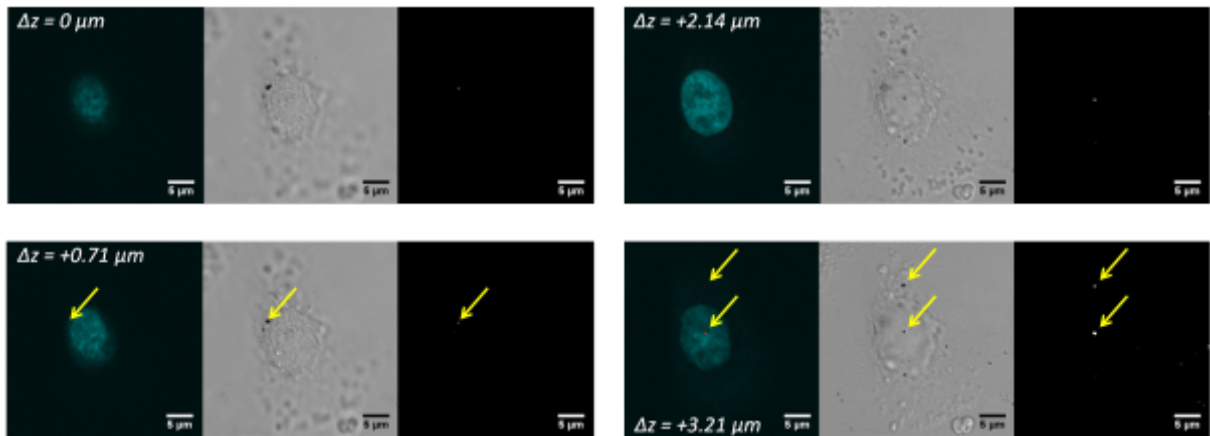

**Figure S24.** CLSM z-stack images of A549 cells treated with **GNP-lip-AA-PtIVsuc** for 3 h. From left to right, fluorescence overlay image of AuNP fluorescence (red) and Hoechst nuclear stain (cyan), bright field mode, and reflection mode.

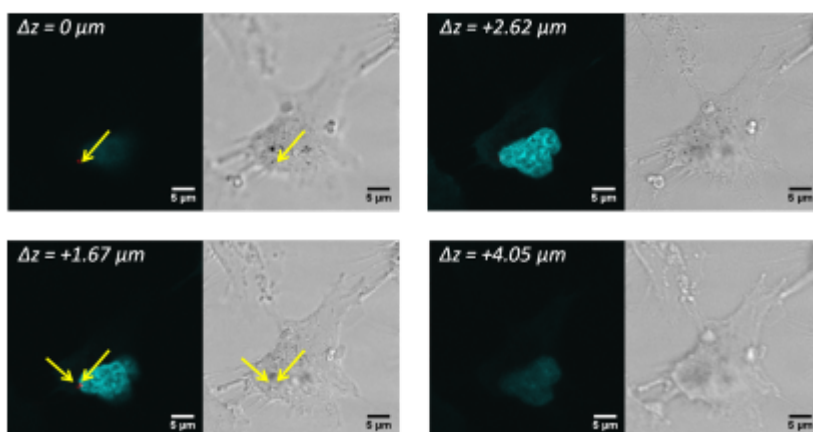

**Figure S25.** CLSM z-stack images of A549 cells treated with **GNP-lip-AA-PtIVsuc** for 24 h. From left to right, fluorescence overlay image of AuNP fluorescence (red) and Hoechst nuclear stain (cyan), and bright field mode.

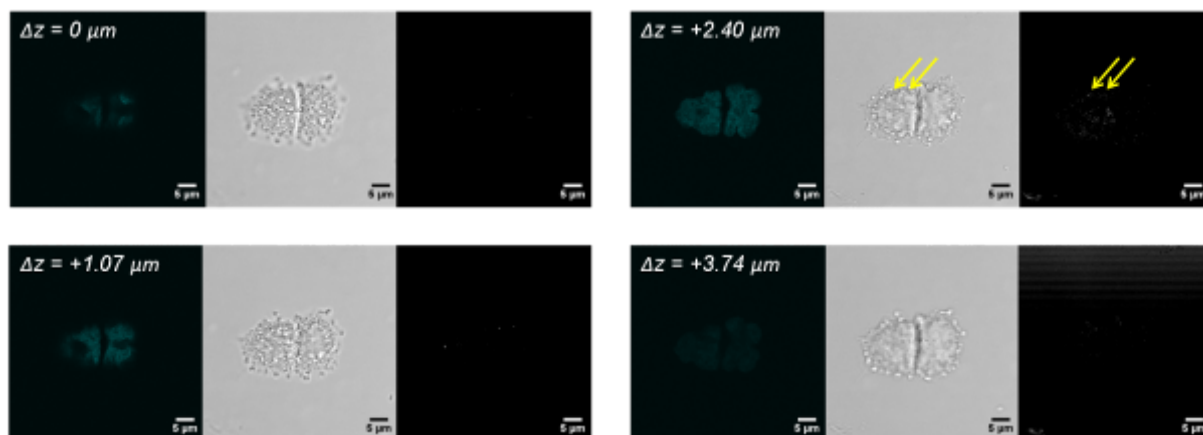

**Figure S26.** CLSM z-stack images of A2780 cells treated with **GNP-lip** for 3 h. From left to right, fluorescence overlay image of AuNP fluorescence (red) and Hoechst nuclear stain (cyan), bright field mode, and reflection mode.

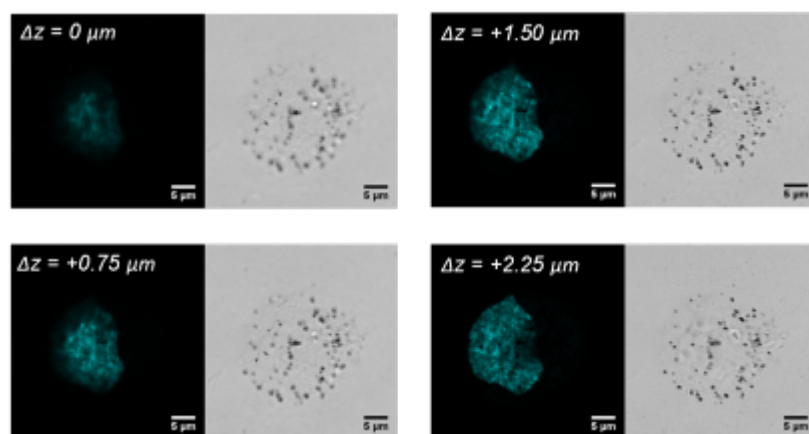

**Figure S27.** CLSM z-stack images of A2780 cells treated with **GNP-lip** for 24 h. From left to right, fluorescence overlay image of AuNP fluorescence (red) and Hoechst nuclear stain (cyan), and bright field mode.

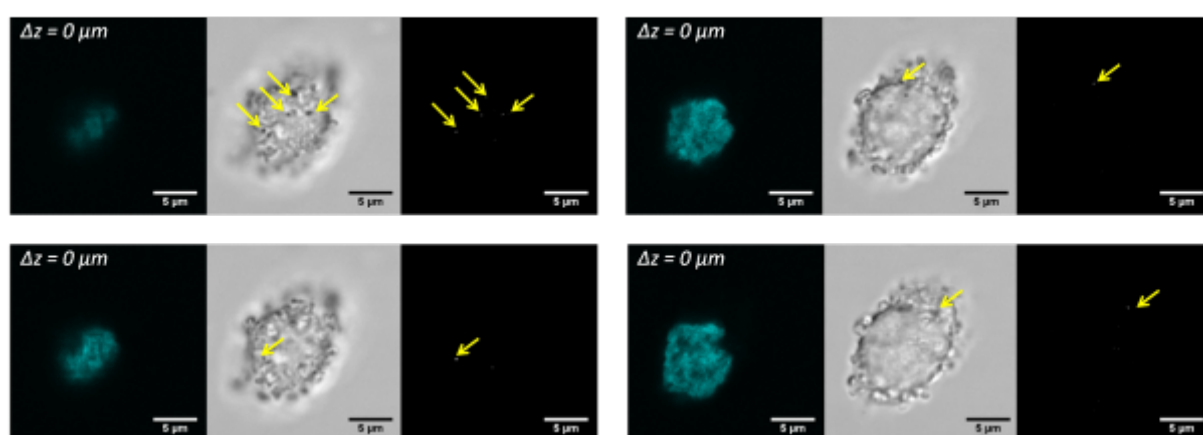

**Figure S28.** CLSM z-stack images of A2780 cells treated with **GNP-lip-PtII** for 3 h. From left to right, fluorescence overlay image of AuNP fluorescence (red) and Hoechst nuclear stain (cyan), bright field mode and reflection mode.

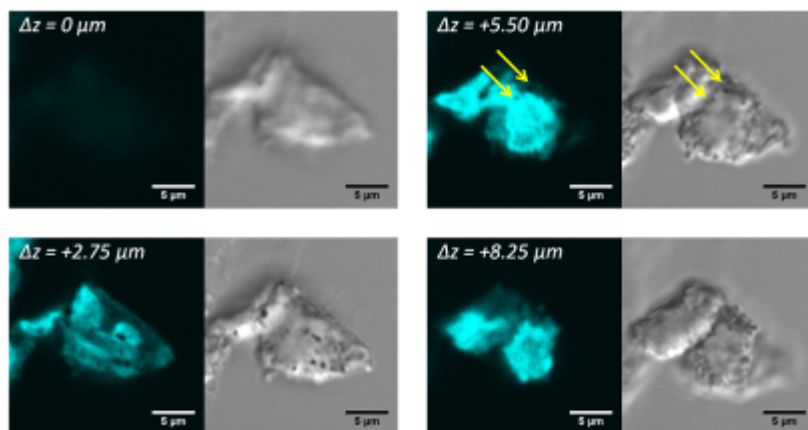

**Figure S29.** CLSM z-stack images of A2780 cells treated with **GNP-lip-PtII** for 24 h. From left to right, fluorescence overlay image of AuNP fluorescence (red) and Hoechst nuclear stain (cyan), and bright field mode.

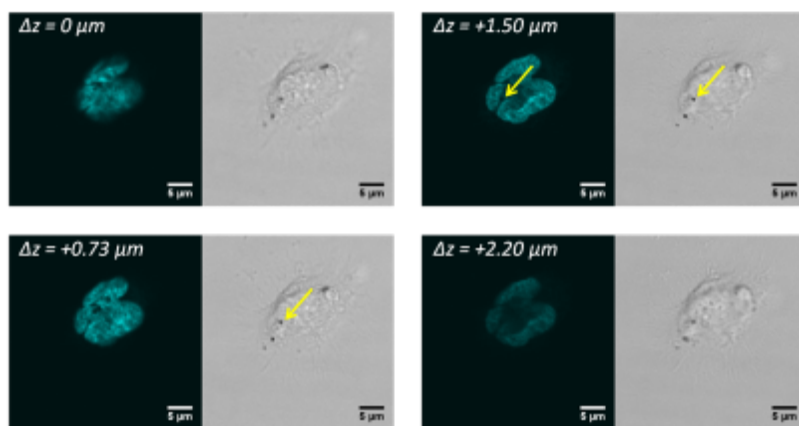

**Figure S30.** CLSM z-stack images of A2780 cells treated with **GNP-lip-PtIVsuc** for 3 h. From left to right, fluorescence overlay image of AuNP fluorescence (red) and Hoechst nuclear stain (cyan), and bright field mode.

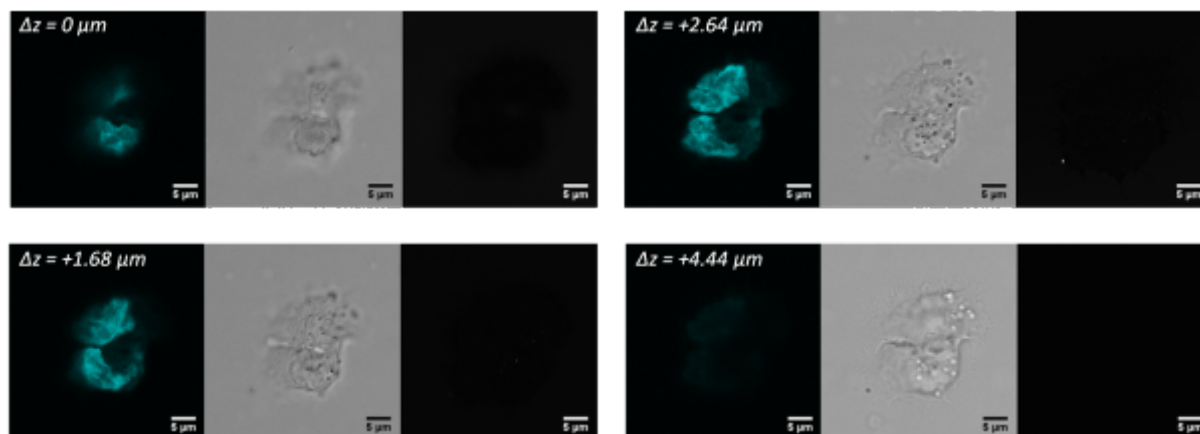

**Figure S31.** CLSM z-stack images of A2780 cells treated with **GNP-lip-PtIVsuc** for 24 h. From left to right, fluorescence overlay image of AuNP fluorescence (red) and Hoechst nuclear stain (cyan), bright field mode, and reflection mode.

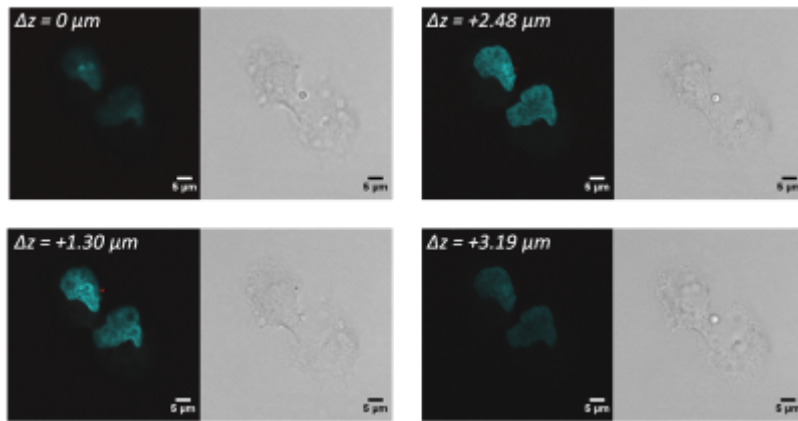

**Figure S32.** CLSM z-stack images of A2780 cells treated with **GNP-lip-AA** for 3 h. From left to right, fluorescence overlay image of AuNP fluorescence (red) and Hoechst nuclear stain (cyan), and bright field mode.

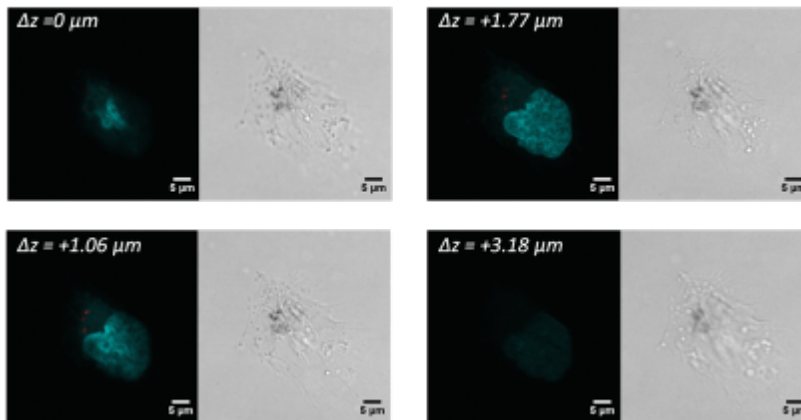

**Figure S33.** CLSM z-stack images of A2780 cells treated with **GNP-lip-AA** for 24 h. From left to right, fluorescence overlay image of AuNP fluorescence (red) and Hoechst nuclear stain (cyan), and bright field mode.

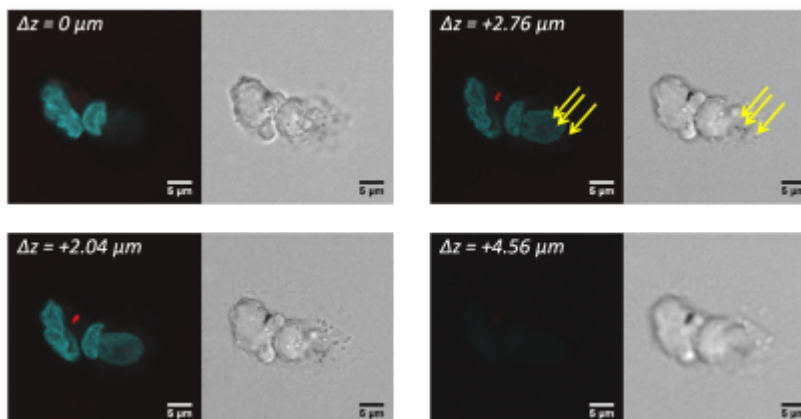

**Figure S34.** CLSM z-stack images of A2780 cells treated with **GNP-lip-AA-PtII** for 3 h. From left to right, fluorescence overlay image of AuNP fluorescence (red) and Hoechst nuclear stain (cyan), and bright field mode.

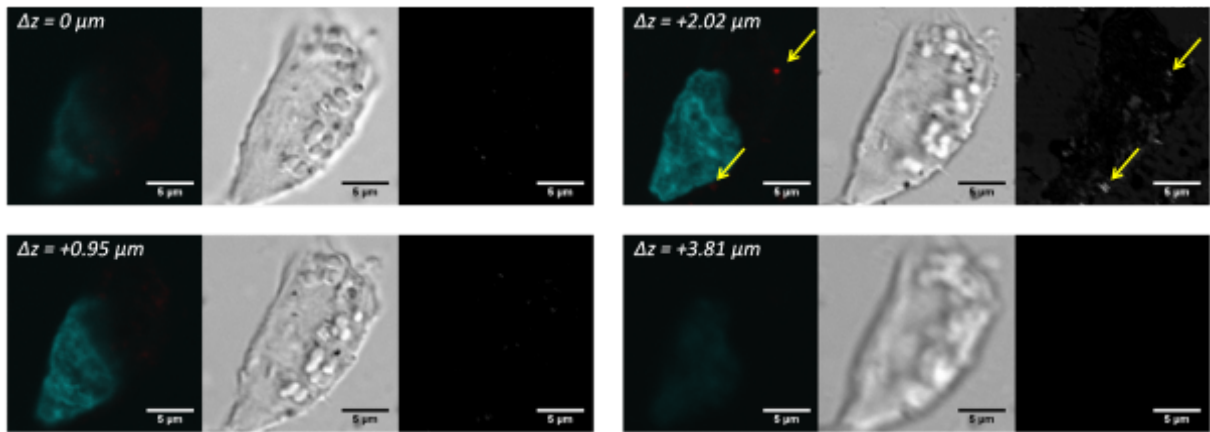

**Figure S35.** CLSM z-stack images of A2780 cells treated with **GNP-lip-AA-PtII** for 24 h. From left to right, fluorescence overlay image of AuNP fluorescence (red) and Hoechst nuclear stain (cyan), bright field mode, and reflection mode.

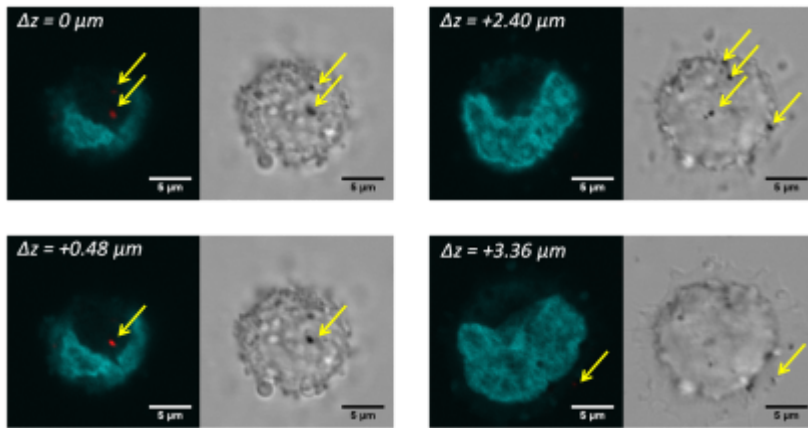

**Figure S36.** CLSM z-stack images of A2780 cells treated with **GNP-lip-AA-PtIVsuc** for 3 h. From left to right, fluorescence overlay image of AuNP fluorescence (red) and Hoechst nuclear stain (cyan), and bright field mode.

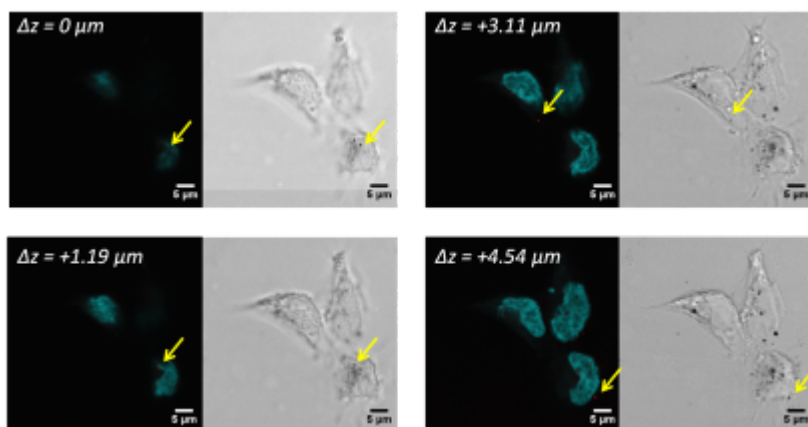

**Figure S37.** CLSM z-stack images of A2780 cells treated with **GNP-lip-AA-PtIVsuc** for 24 h. From left to right, fluorescence overlay image of AuNP fluorescence (red) and Hoechst nuclear stain (cyan), and bright field mode.



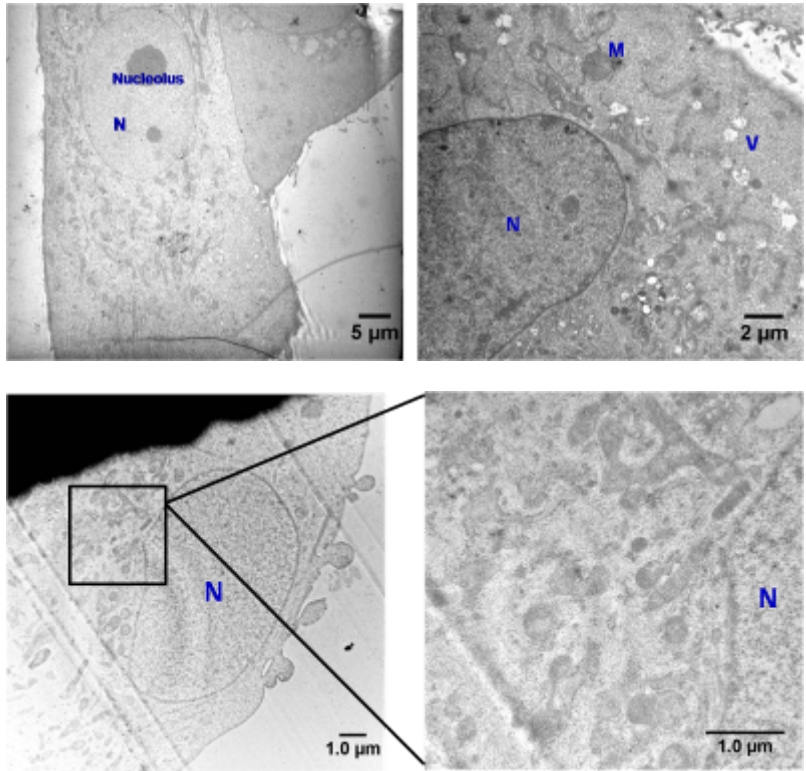

**Figure S38.** TEM images untreated A549 (top) and A2780 cells (bottom). N stands for nucleus, M for mitochondria, and V for vacuole.

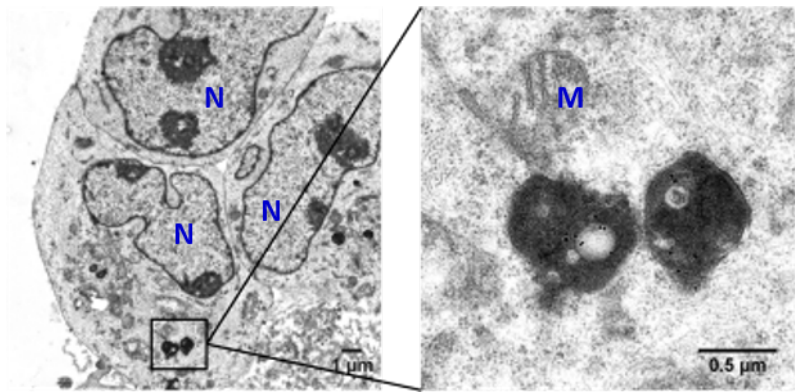

**Figure S39.** TEM images of A2780 cells treated with **GNP-lip** for 24 h. N: nucleus, M: mitochondria.

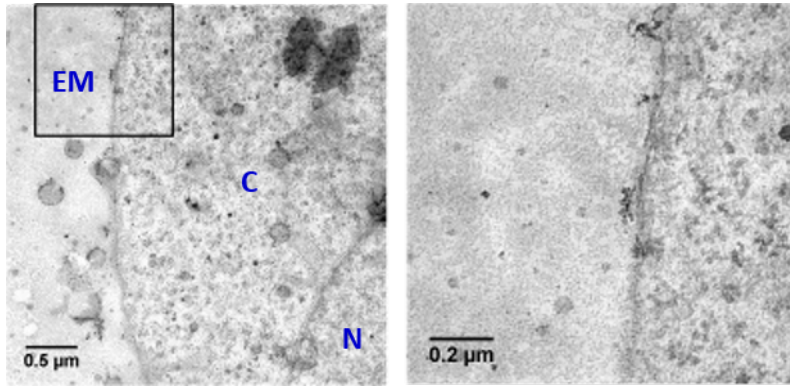

**Figure S40.** TEM images of A2780 cells treated with **GNP-lip-PtII** for 24 h. EM: extracellular media, C: cytoplasm; N: nucleus.

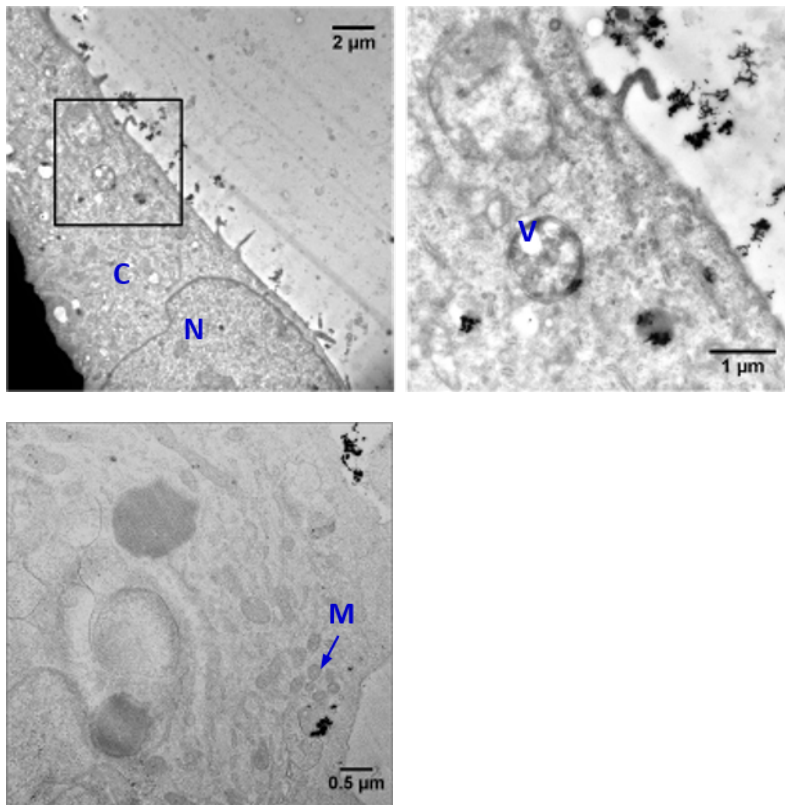

**Figure S41.** TEM images of A549 (top) and A2780 cells (bottom) treated with **GNP-lip-PtIVsuc** for 24 h. C: cytoplasm, N: nucleus, M: mitochondrion, V: vacuole.

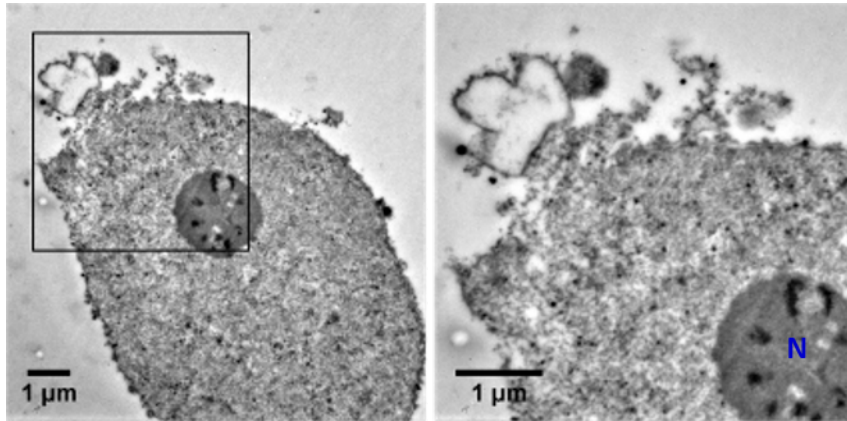

**Figure S42.** TEM images of A2780 cells treated with **GNP-lip-AA** for 24 h. N: nucleus.

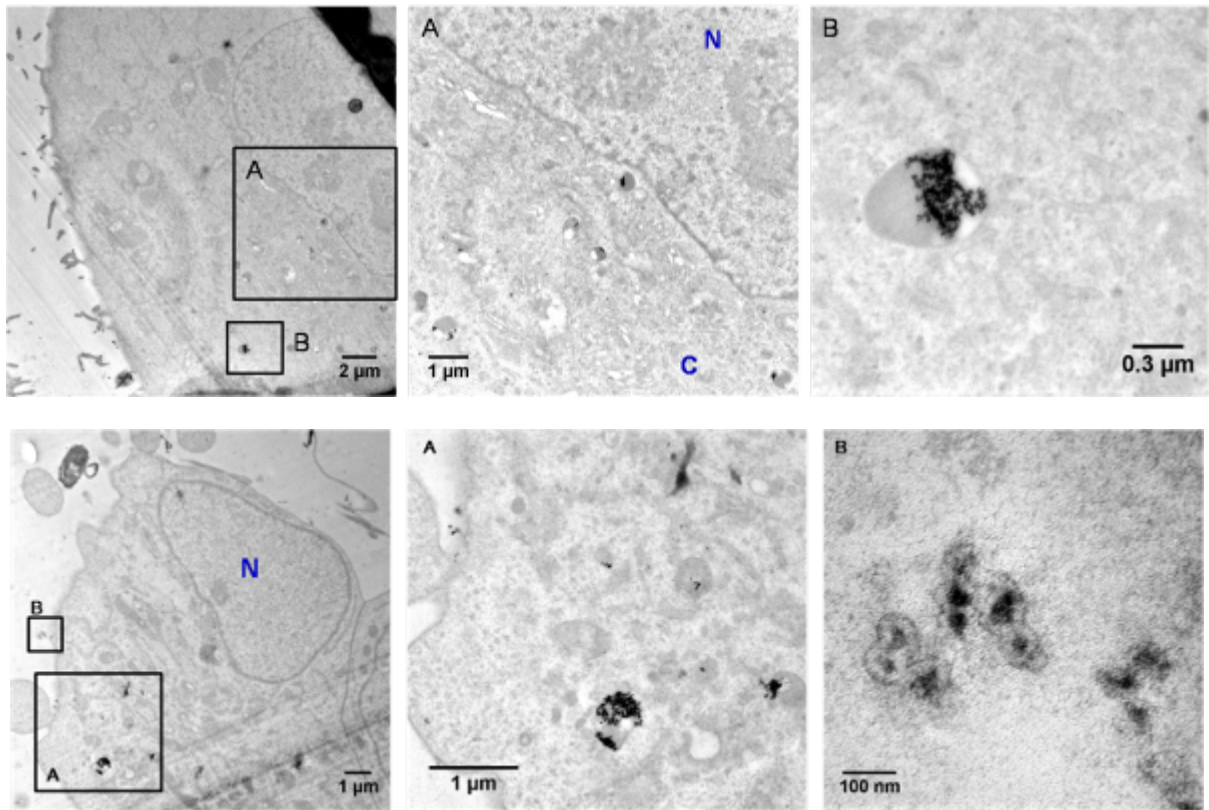

**Figure S43.** TEM images of A549 (top) and A2780 cells (bottom) treated with **GNP-lip-AA-PtII** for 24 h. N: nucleus, C: cytoplasm.

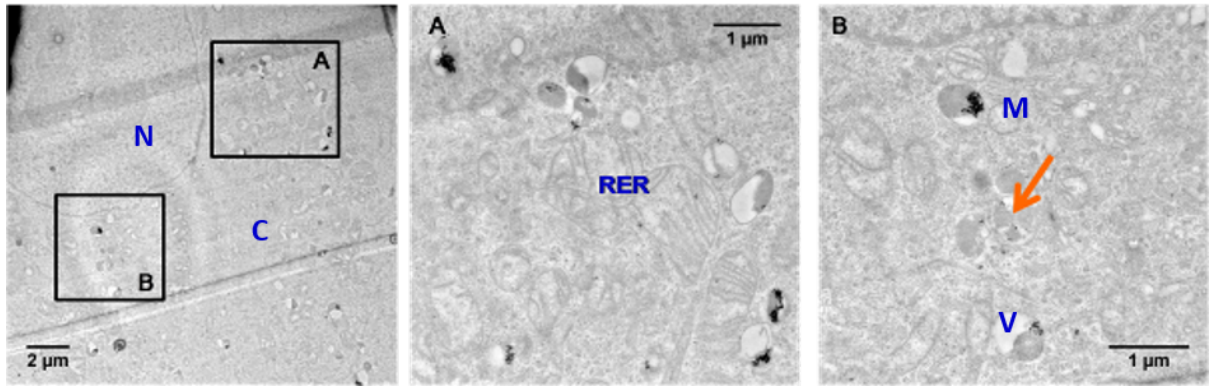

**Figure S44.** TEM images of A549 treated with **GNP-lip-AA-PtIVsuc** for 24 h. RER: rough endoplasmic reticulum, N: nucleus, C: cytoplasm.

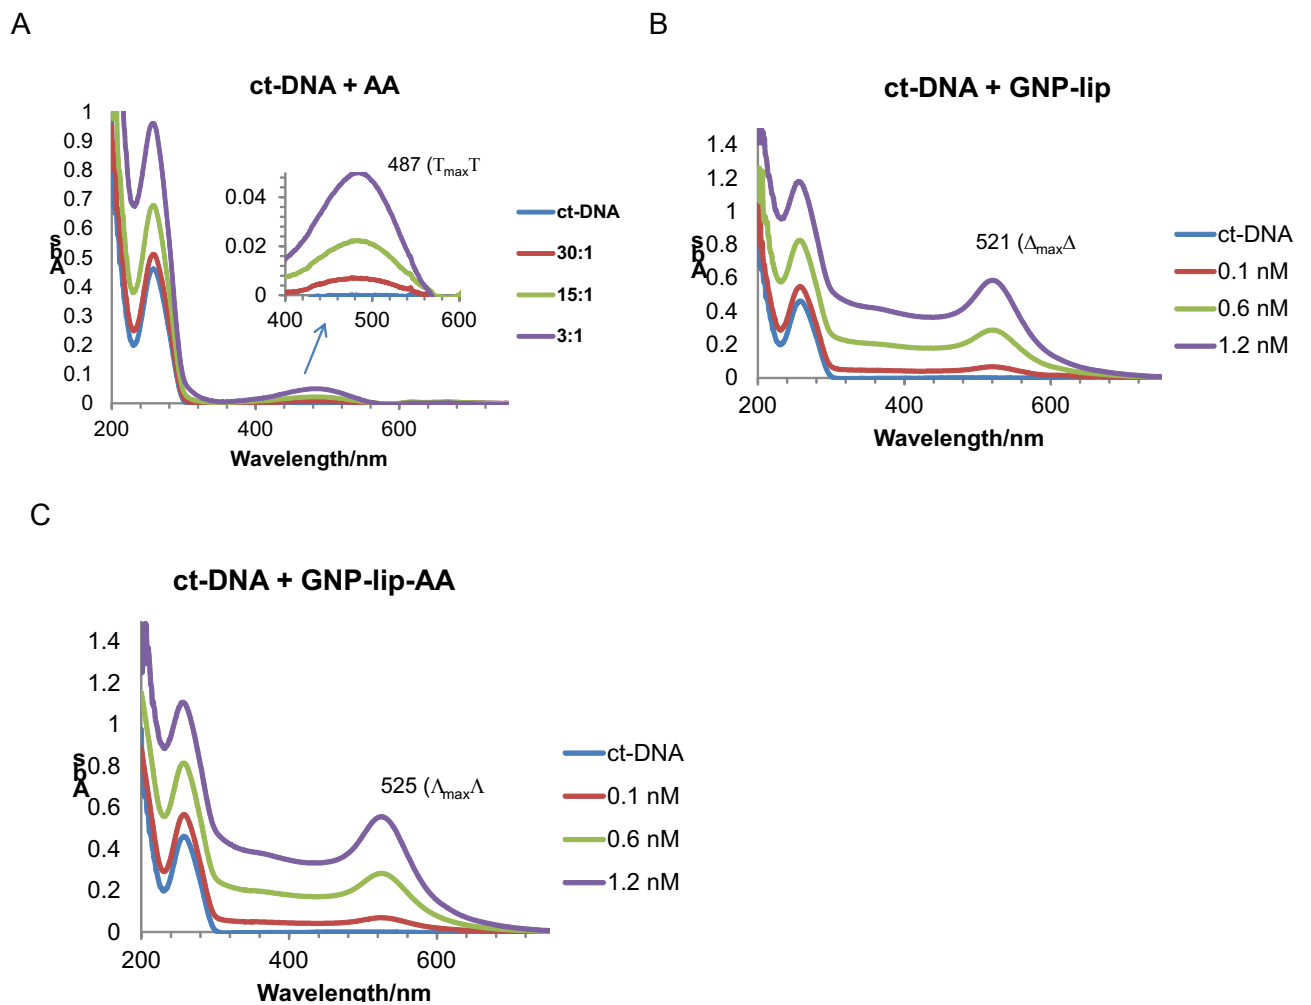

**Figure S45.** UV-Vis spectra of ct-DNA (75  $\mu$ M in 10 mM NaCl and 1 mM Tris-HCl, pH 7.5) in the presence of increasing concentrations of A) **AA** (DNA:AA ratio in the legend) B) **GNP-lip** and C) **GNP-lip-AA**. Shift of  $\lambda_{\max}$  of SPR band in the presence of DNA were not observed

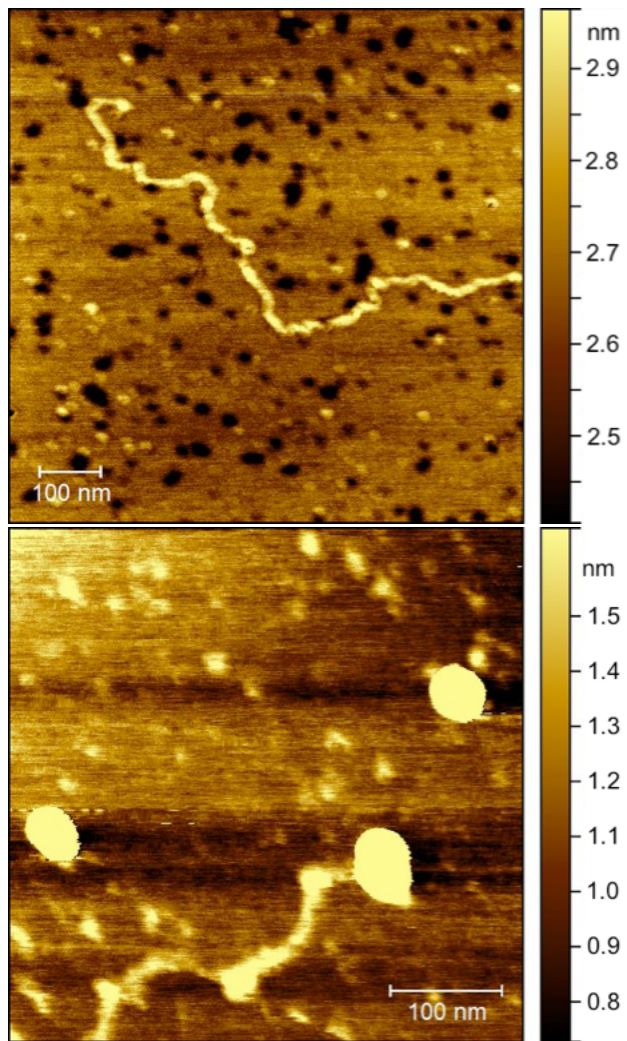

**Figure S46.** AFM images of linearised pBR322 plasmid DNA (top) alone and (bottom) with GNP-lip-AA.

**Table S1** Comparative statistical Analysis (p-values) of IC50 data

A2780

|                 | GNP-lip-PtII | GNP-lip-PtIVsuc | GNP-lip-AA | GNP-lip-AA-PtII | GNP-lip-AA-PtIVsuc |
|-----------------|--------------|-----------------|------------|-----------------|--------------------|
| cisplatin       | 0.81         |                 |            | >0.99           |                    |
| cisPtIVsuc-Cl   |              | <0.05           |            |                 | <0.001             |
| GNP-lip         | <0.0001      | <0.001          | <0.0001    | <0.0001         | <0.0001            |
| GNP-lip-PtII    |              |                 |            | 0.86            |                    |
| GNP-lip-PtIVsuc |              |                 |            |                 | 0.49               |
| GNP-lip-AA      |              |                 |            | 0.99            | >0.99              |

A549

|                 | GNP-lip-PtII | GNP-lip-PtIVsuc | GNP-lip-AA | GNP-lip-AA-PtII | GNP-lip-AA-PtIVsuc |
|-----------------|--------------|-----------------|------------|-----------------|--------------------|
| cisplatin       | 0.051        |                 |            | 0.92            |                    |
| cisPtIVsuc-Cl   |              | <0.001          |            |                 | <0.0001            |
| GNP-lip         | <0.001       | <0.0001         | <0.0001    | <0.0001         | <0.0001            |
| GNP-lip-PtII    |              |                 |            | <0.01           |                    |
| GNP-lip-PtIVsuc |              |                 |            |                 | 0.56               |
| GNP-lip-AA      |              |                 |            | >0.99           | >0.99              |

**Table S2:** Polydispersity values from DLS measurements

|                 | PDI Values |
|-----------------|------------|
| GNP-lip         | 0.421      |
| GNP-lip-PtII    | 0.461      |
| GNP-lip-PtIV    | 0.444      |
| GNP-lip-AA      | 0.273      |
| GNP-lip-AA-PtII | 0.402      |
| GNP-lip-AA-PtIV | 0.441      |
